# Supplementary material for: Transcriptional dynamics of transposable elements when converting fibroblast cells of Macaca mulatta to neuroepithelial stem cells
Source: PubMed Central journal article supplement (PMC8176597; doi:10.1186/s12864-021-07717-9), 2021-06-04
Supplement: 12864_2021_7717_MOESM2_ESM.pdf [file 12864_2021_7717_MOESM2_ESM.pdf]

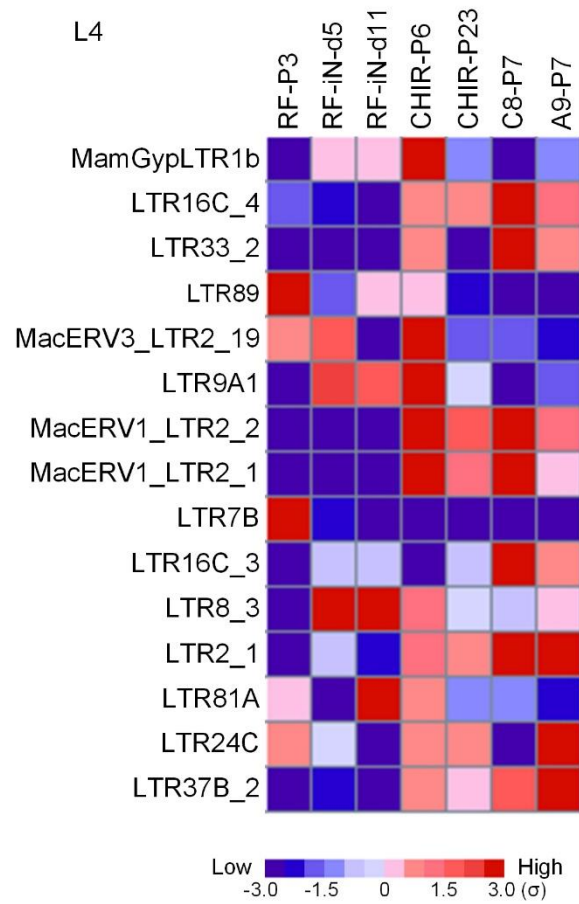

**Figure S1.** The expression levels of LTRs in the Cluster L4 of Figure 3A.

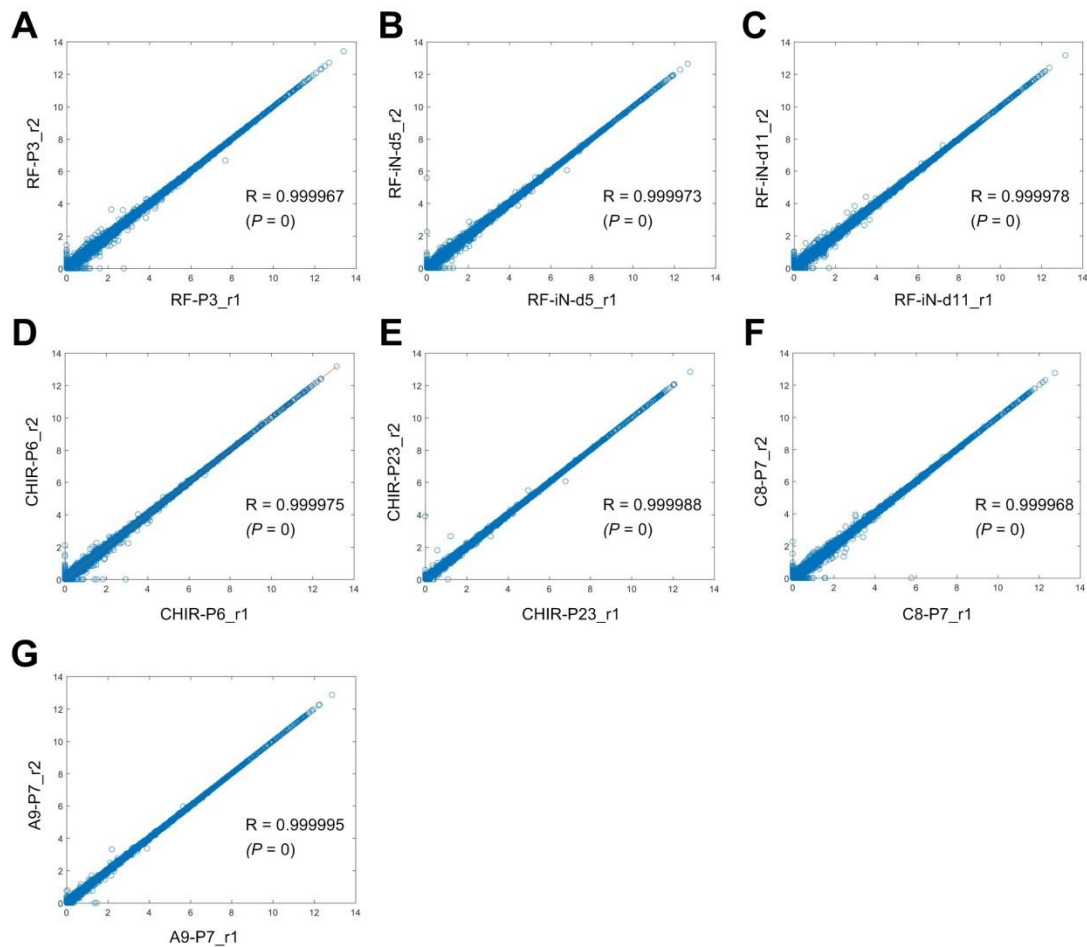

**Figure S2.** The scatter plots of log<sub>2</sub> scaled abundances (FPKM + 1) of genes. The correlation values ( $R$ ) and  $P$ -values ( $P$ ) were calculated by using the corrcoef function in MatLab. (A) The scatter plot for the two biological replicates of the RF-P3 cell line. (B) The scatter plot for the two biological replicates of the RF-iN-d5 cell line. (C) The scatter plot for the two biological replicates of the RF-iN-d11 cell line. (D) The scatter plot for the two biological replicates of the CHIR-P6 cell line. (E) The scatter plot for the two biological replicates of the CHIR-P23 cell line. (F) The scatter plot for the two biological replicates of the C8-P7 cell line. (G) The scatter plot for the two biological replicates of the A9-P7 cell line.

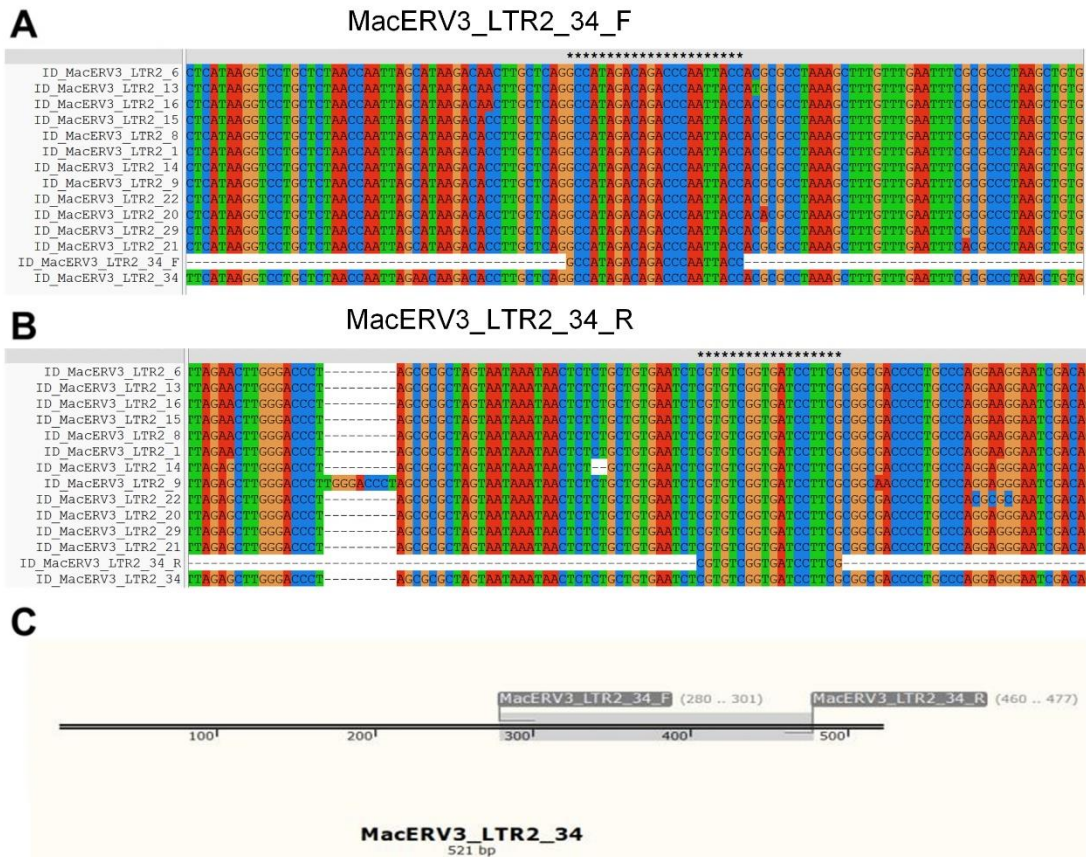

**Figure S3.** The primers used to validate the expression of 13 MacERV3 LTRs. (A) The alignment of the forward primer MacERV3\_LTR2\_34\_F and the 13 MacERV3 LTRs. (B) The alignment of the reverse primer MacERV3\_LTR2\_34\_R and the 13 MacERV3 LTRs. (C) The precise loci of the two primers on one of the selected MacERV3 LTRs, MacERV3\_LTR2\_34.
